# Supplementary material for: Berberine Improves Inflammatory Responses of Diabetes Mellitus in Zucker Diabetic Fatty Rats and Insulin-Resistant HepG2 Cells through the PPM1B Pathway
Source: PubMed Central journal article supplement (PMC7450322; doi:10.1155/2020/2141508), 2020-08-18
Supplement: 2141508.f1.pdf [file 2141508.f1.pdf]

## Supplementary Figure Legends

**Supplementary Figure 1S Effects of BBR on the HepG2 cell viability.** The cell viability was measured by MTT with BBR treatment at a dose of 0, 5, 10, 20, 30, 40, and 50  $\mu\text{g/ml}$  for 24h (A) and 48h (B). \* $P < 0.05$  and \*\* $P < 0.01$  BBR-treated groups vs Control group.

**Supplementary Figure 2S Effects of insulin on the cell viability, glucose consumption and glucose take-up in HepG2 cells.** The cell viability was measured by MTT with insulin treatment at a dose of  $10^{-5}$ ,  $10^{-6}$ ,  $10^{-7}$  and  $10^{-8}$  mol/L for 24h (A) and 48h (B). (C) The glucose consumption was significantly decreased with  $10^{-5}$  or  $10^{-6}$  mol/L insulin treatment. (D) The fall range of glucose consumption was bigger in 36 h after treatment with insulin at a dose of  $10^{-6}$  mol/L. (E) Representative images of glucose take-up in HepG2 cells. (F) The quantitative analysis of fluorescence associated with 2-NBDG take-up. \* $P < 0.05$  and \*\* $P < 0.01$  Insulin groups vs Control group.

**Supplementary Figure 3S Efficient PPM1B knockdown at the mRNA and protein levels in human HepG2 cells using lentiviral-mediated RNAi.** (A) Representative images of GFP expression in HepG2 cells after infection using shNC or shPPM1B-1/PPM1B-2/PPM1B-3 lentiviruses. PPM1B mRNA (B) and protein(C) expression in HepG2 cells after transfection of shNC or shPPM1B-1 /PPM1B-2 /PPM1B-3 lentiviruses. GAPDH was used as an internal control, and the data represent the mean  $\pm$  SD of three independent experiments. (\* $P < 0.05$ , \*\* $P < 0.01$ ; shPPM1B-1/PPM1B-2/PPM1B-3 lentiviruses vs shNC group; Magnification, $\times 100$ ; Scale bar,  $100\mu\text{m}$ )

### Supplementary Figure 1S

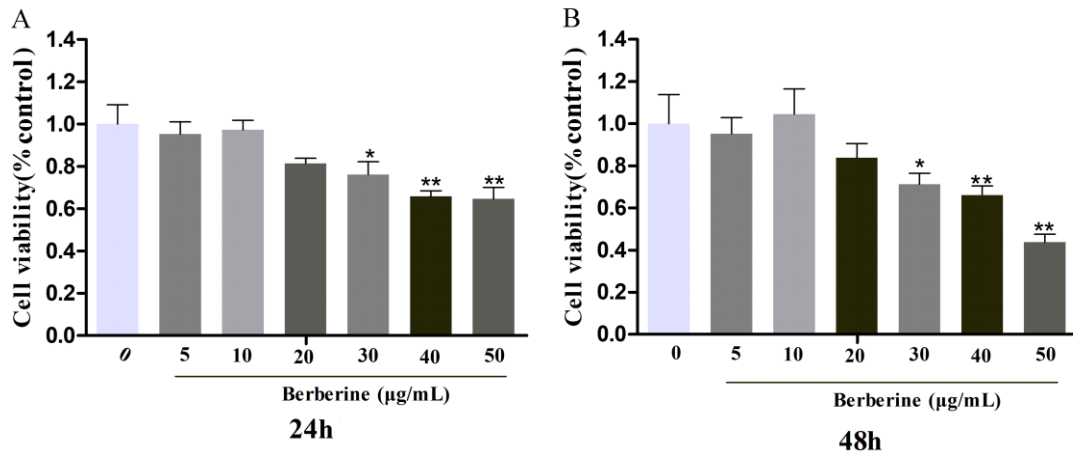

### Supplementary Figure 2S

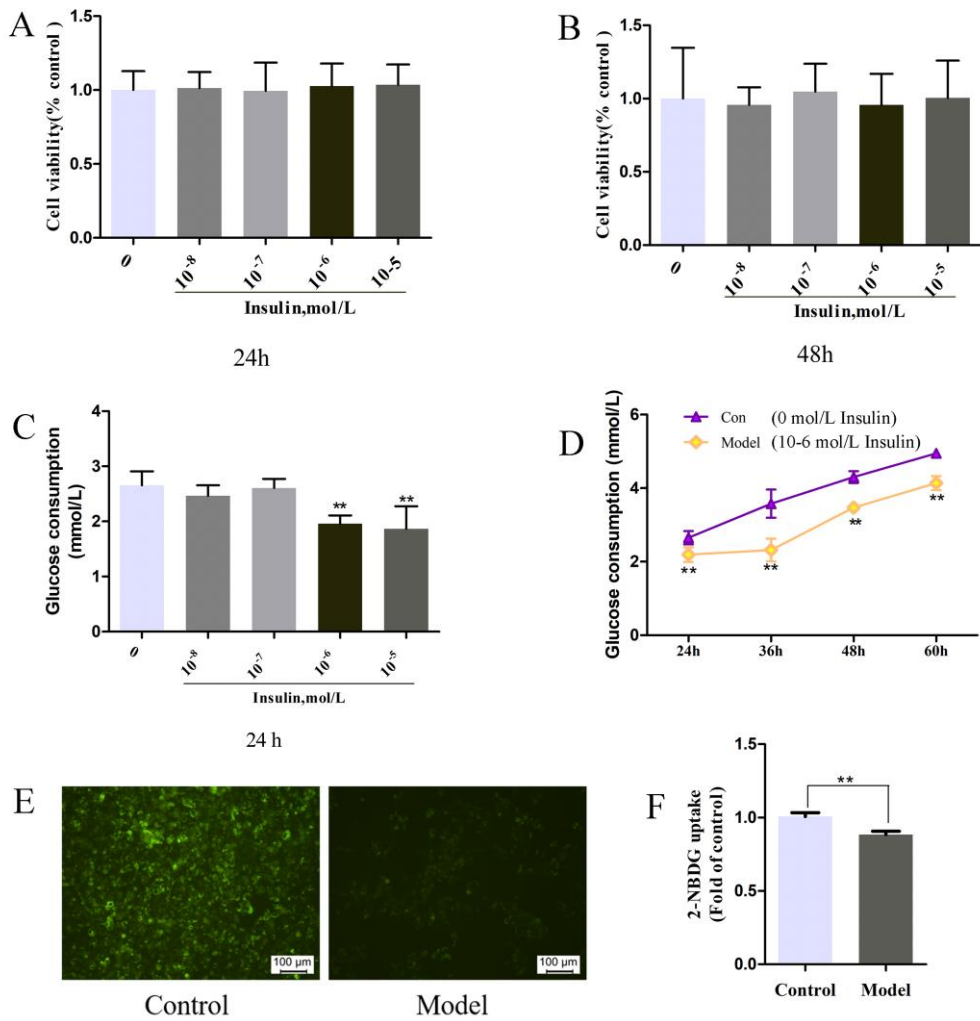

### Supplementary Figure 3S

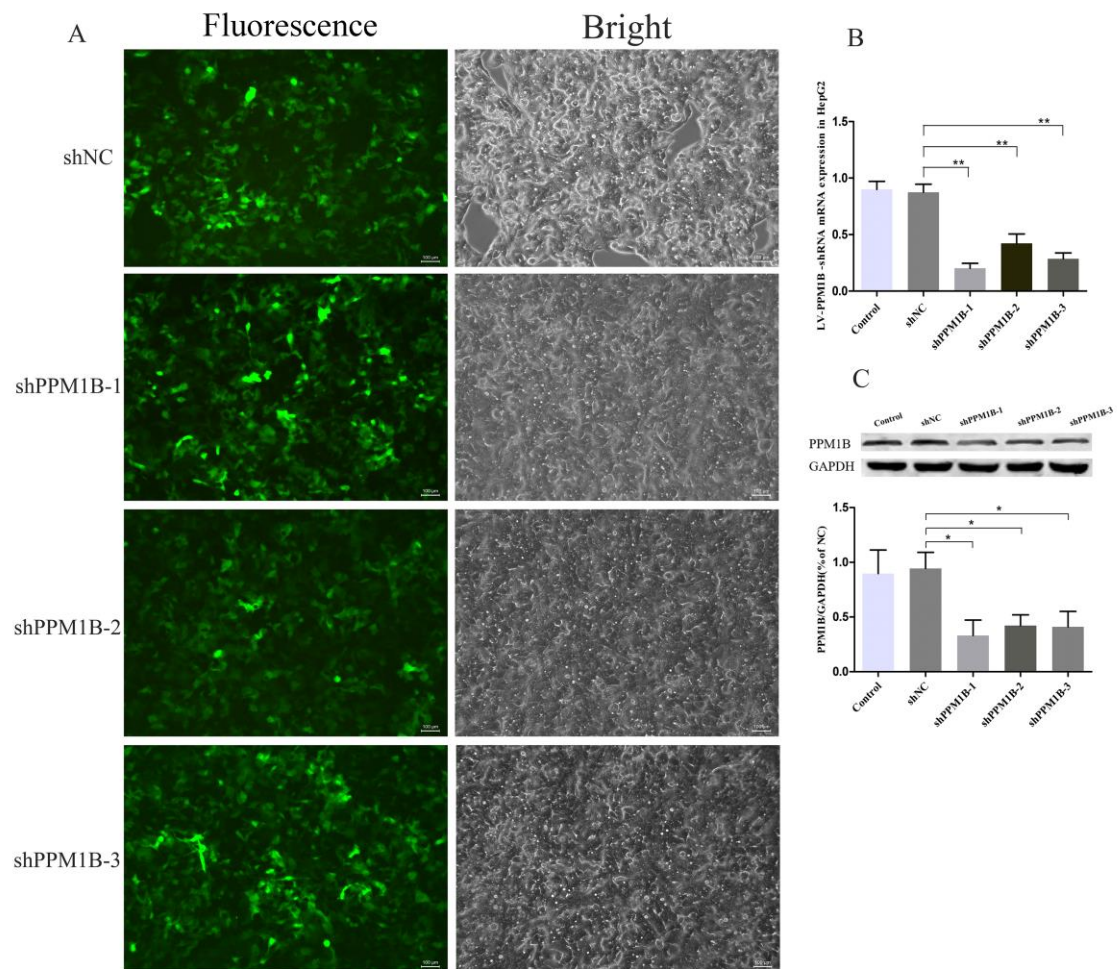

**Table S1 Primer of q-PCR**

| Primer          | Species      | Sequence 5'-3'              |
|-----------------|--------------|-----------------------------|
| TNF $\alpha$ -F | Homo sapiens | AGGACCAGCTAAGAGGGAGA        |
| TNF $\alpha$ -R | Homo sapiens | CCCGGATCATGCTTTCAGTG        |
| IL-1 $\beta$ -F | Homo sapiens | ATGCCACCTTTTGACAGTGATG      |
| IL-1 $\beta$ -R | Homo sapiens | AGCTTCTCCACAGCCACAAT        |
| IL-6-F          | Homo sapiens | AAGCCAGAGTCATTCAGAGCAATACTG |
| IL-6-R          | Homo sapiens | GATGAGTTGGATGGTCTTGGTCCTTAG |
| IL-8-F          | Homo sapiens | TTGGCAGCCTTCCTGATTCT        |
| IL-8-R          | Homo sapiens | TTTGGGGTGGAAAGGTTTGGGA      |
| IL-10-F         | Homo sapiens | GCCTTCAGCAGAGTGAAGACT       |
| IL-10-R         | Homo sapiens | GGCAACCCAGGTAACCCTTA        |

|                  |              |                         |
|------------------|--------------|-------------------------|
| PDE3B-F          | Homo sapiens | AATGGCCCAGCAAAAAGTTTCG  |
| PDE3B-R          | Homo sapiens | GAGTTACACAGGGGACCCAC    |
| PDE4A-F          | Homo sapiens | GCGGGACCTACTGAAGAAATTCC |
| PDE4A-R          | Homo sapiens | CAGGGTGGTCCACATCGTGG    |
| PPM1B-F          | Homo sapiens | GCTTGTGATGGGATCTGGGA    |
| PPM1B-R          | Homo sapiens | TCTCCATAATCTCTTCAACCCGT |
| IKK $\beta$ -F   | Homo sapiens | AGCTCTGGAACCTCCTGAAGA   |
| IKK $\beta$ -R   | Homo sapiens | AGCTCCAGTCTAGGGTCGTGA   |
| PPAR $\gamma$ -F | Homo sapiens | CTGCCGGATCCACAAAAAAG    |
| PPAR $\gamma$ -R | Homo sapiens | CGCCAACAGCTTCTCCTTCTCG  |
| LRP1-F           | Homo sapiens | TCCTGCCTGCTCCTCAGTAT    |
| LRP1-R           | Homo sapiens | AGAGCCAAGGAAAGGAAAGC    |
| NF $\kappa$ B-F  | Homo sapiens | AGTTGAGGGGACTTCCCAGGC   |
| NF $\kappa$ B -R | Homo sapiens | GCCTGGGAAAGTCCCCTCAACT  |
| JNK1-F           | Homo sapiens | GTGGGGTATGCCCAAGAGG     |
| JNK1-R           | Homo sapiens | GCCATAAAGCCCAGATAGAGC   |
| GLUT4-F          | Homo sapiens | CAGCTCTCAGGCATCAAT      |
| GLUT4-R          | Homo sapiens | TCTACTAAGAGCACCGAG      |
| IRS1-F           | Homo sapiens | CAAGAGCATGCACAAACGCT    |
| IRS1-R           | Homo sapiens | GCCCGCTTGTTGATGTTGAA    |
| PI3K p85-F       | Homo sapiens | TCCTGCTATGGCAGACATCC    |
| PI3K p85-R       | Homo sapiens | AGAAATGGTAGCTTCCCGAGG   |
| AKT-F            | Homo sapiens | TCGGAGACTGACACCAGGTA    |
| AKT-R            | Homo sapiens | CTGGCCGAGTAGGAGAACTG    |
| IRS2-F           | Homo sapiens | CTCACCTGTAGTGCCTTCG     |
| IRS2-R           | Homo sapiens | ATGTTGATGTACTCGCCGGG    |
| GAPDH-F          | Homo sapiens | CGGGGCTGGCATTGCTCTC     |
| GAPDH-R          | Homo sapiens | GGGGCCGACTTGGGATAGG     |

---

**Table S2 Functional and pathway enrichment analysis of DEGs in BBR (150mg/Kg) group**

| Category     | Term       | Description                                      | Genes                                                                 | FDR              |
|--------------|------------|--------------------------------------------------|-----------------------------------------------------------------------|------------------|
| GO_BP        | GO:0006508 | proteolysis                                      | Capn11,Casp14,Ctsd ,Cma1, Lonp1, Mst1,Sri                             | 7.4E-3           |
| GO_BP        | GO:0070884 | regulation of calcineurin-NFAT signaling cascade | Nfat5, Rcan1                                                          | 1.8E-2           |
| GO_BP        | GO:0050771 | negative regulation of axonogenesis              | Mbp, Pten                                                             | 4.6E-2           |
| GO_MF        | GO:0042802 | identical protein binding                        | Rbmx, Lyc2, Mri1, Pten, Rcan1, Safb2, Sri, Trip10, Tfrc               | 3.6E-3           |
| GO_MF        | GO:0003727 | single-stranded RNA binding                      | Rbmx, Hmgb1, Lonp1                                                    | 1.3E-2           |
| GO_MF        | GO:0003725 | double-stranded RNA binding                      | Hsp90ab1, Hmgb1, Tfrc                                                 | 3.0E-2           |
| GO_MF        | GO:0003723 | poly(A) RNA binding                              | Rbmx,Fam98a,Hsp90ab1,Hmgb1,Nol8,<br>Ppan, Rps12, Safb2, Tfrc, Zcchc9  | 3.1E-2           |
| GO_MF        | GO:0000166 | nucleotide binding                               | Rbmx, Marf1, Nol8, Rcan1, Safb2                                       | 3.7E-2           |
| GO_MF        | GO:0042277 | peptide binding                                  | Ctsd, Cma1, Hmgb1<br>Gng5,Lypd2,Rbmx,Arpc1a,Asna1, Casp14, Ctsd,      | 3.8E-2<br>2.1E-2 |
| GO_CC        | GO:0070062 | extracellular exosome                            | Hsp90ab1, Lyc2, Mst1, Pgm2, Safb2, Sri, Tnxb, Trip10,<br>Tfrc, Zfp445 |                  |
| GO_CC        | GO:0005694 | chromosome                                       | Recql, Setd2, Hmgb1                                                   | 3.0E-2           |
| GO_CC        | GO:0043231 | Intracellular membrane-bounded organelle         | Btaf1, Ahcy12, Cma1, Safb2, Snapc1, Trip10, Tfrc                      | 3.6E-2           |
| GO_CC        | GO:0042470 | melanosome                                       | Ctsd, Hsp90ab1, Tfrc                                                  | 4.1E-2           |
| GO_CC        | GO:0042995 | cell projection                                  | Mbp, Pten, Trip10                                                     | 4.6E-2           |
| KEGG pathway | hsa04151   | PI3K-Akt signaling pathway                       | Gng5, Atf6b, Hsp90ab1, Lamb3, Pten                                    | 3.2E-2           |

Abbreviations: GO, gene ontology; KEGG, Kyoto Encyclopedia of Genes and Genomes.BP, biological process; CC, cellular component; MF, molecular functions; FDR, false discovery rate
